# Supplementary material for: An atlas of genetic effects on the monocyte methylome across European and African populations
Source: bioRxiv or medRxiv preprint supplement (doi:10.1101/2024.08.12.24311885), 2026-01-29
Supplement: Supplementary file [file media-2.pdf]

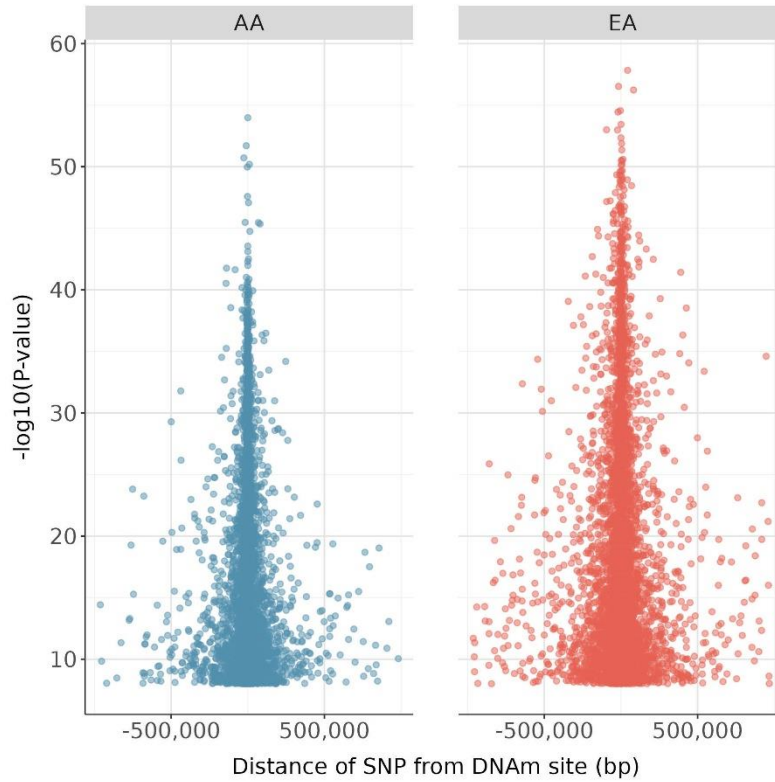

**Supplementary Fig.1: Relationship between p-values and the distance from SNP to DNAm site in the AA and EA populations.** The scatter plots depict the association between the distance from the SNP to the DNAm site (measured in base pairs, bp) and the corresponding  $-\log_{10}(\text{p-values})$  for the detected meQTLs in the AA (left panel) and EA (right panel) populations. Higher values indicate more significant meQTL associations.
